# Supplementary material for: Rocket (Eruca vesicaria (L.) Cav.) vs. Copper: The Dose Makes the Poison?
Source: MDPI journal article supplement (doi:10.3390/molecules27030711), 2022-01-21
Supplement: s1 [file s1]

## Supplementary Materials

# Rocket (*Eruca vesicaria* (L.) Cav.) vs. Copper: The Dose Makes the Poison?

Mario Nikola Mužek <sup>1,\*</sup>, Franko Burčul <sup>2,\*</sup>, Dario Omanović <sup>3</sup>, Azra Đulović <sup>4</sup>, Sandra Svilović <sup>5</sup> and Ivica Blažević <sup>4</sup>

<sup>1</sup> Department of Inorganic Technology, Faculty of Chemistry and Technology University of Split, Ruđera Boškovića 35, 21000 Split, Croatia; muky@ktf-split.hr

<sup>2</sup> Department of Analytical Chemistry, Faculty of Chemistry and Technology University of Split, Ruđera Boškovića 35, 21000 Split, Croatia; franko@ktf-split.hr

<sup>3</sup> Division for Marine and Environmental Research, Laboratory for physical chemistry of traces, Ruđer Bošković Institute, Bijenička cesta 54, 10000 Zagreb, Croatia; omanovic@irb.hr

<sup>4</sup> Department of Organic Chemistry, Faculty of Chemistry and Technology University of Split, Ruđera Boškovića 35, 21000 Split, Croatia; azra@ktf-split.hr (A.Đ.); blazevic@ktf-split.hr (I.B.)

<sup>5</sup> Department of Chemical Engineering, Faculty of Chemistry and Technology University of Split, Ruđera Boškovića 35, 21000 Split, Croatia; sandra@ktf-split.hr

\* Correspondence: muky@ktf-split.hr (M.N.M.); franko@ktf-split.hr (F.B.)

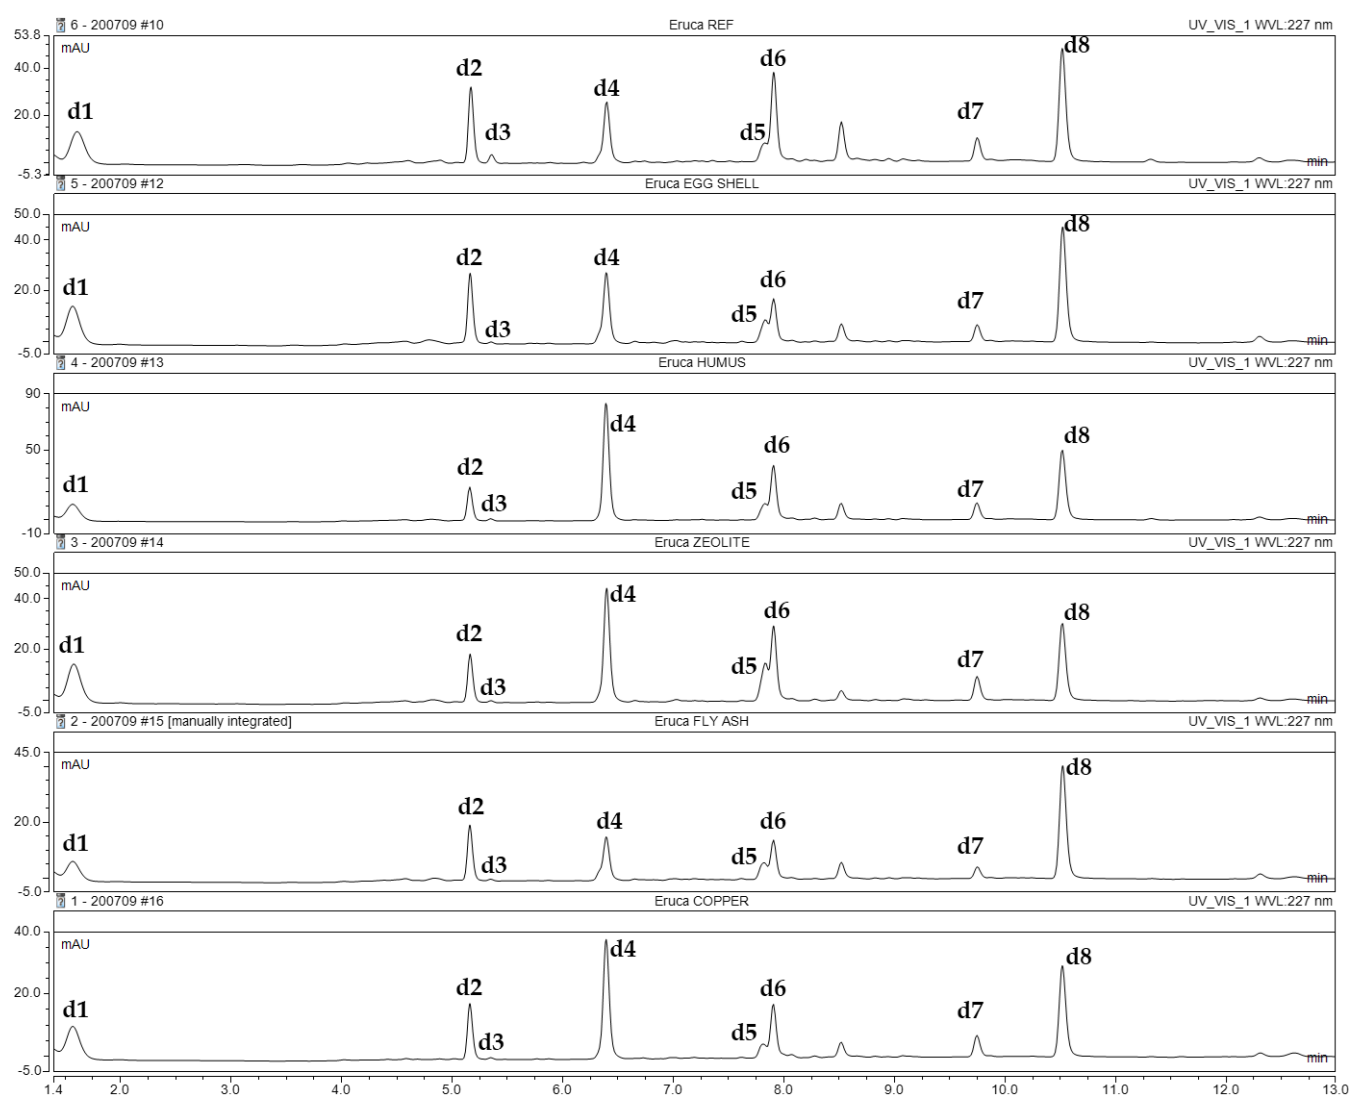

**Figure S1.** Chromatograms of desulfoglucosinolates obtained from the rocket (*Eruca vesicaria* (L.) Cav.): **d1** - glucoraphanin; **d2** - 4-( $\beta$ -D-glucopyranosyldisulfanyl)butyl GSL; **d3** - glucoibervirin; **d4** - glucoerucin; **d5** - 4-methoxyglucobrassicin; **d6** - dimeric 4-mercaptobutyl GSL; **d7** - 1,4-di-methoxyglucobrassicin; **d8** - glucocamelinin (cf. Table 3 and Figure 2).
